# Supplementary material for: A single-molecular twin rotor: correlated motion of two pyrimidine rings coordinated to copper
Source: Royal Society of Chemistry journal article supplement (doi:10.1039/c4cc09182e), 2015-01-01
Supplement: c4cc09182e1.pdf [file c4cc09182e1.pdf]

Supporting Information

**A single-molecular twin rotor: correlated motion of two pyrimidine rings coordinated to copper**

Yusuke Takara,<sup>a</sup> Tetsuro Kusamoto,<sup>a</sup> Tatsuya Masui,<sup>a</sup> Michihiro Nishikawa,<sup>a,b</sup> Shoko Kume<sup>a,c</sup> and Hiroshi Nishihara\*<sup>a</sup>

## Physical measurements

### NMR, ESI-TOF MS

$^1\text{H}$  NMR spectra were recorded with a Bruker DRX500 spectrometer. ESI-TOF mass spectra were recorded using a Micromass LCT spectrometer. In VT  $^1\text{H}$  NMR experiments, the sample tube was introduced into the machine cooled to 203 K, and the data was acquired during the heating process.

### Cyclic voltammetry

Cyclic voltammograms was recorded with ALS 750A electrochemical analyzers (BAS. Co., Ltd.). The working electrode was a 0.3 mm o.d. glassy carbon, a platinum wire served as the auxiliary electrode, and the reference electrode was an  $\text{Ag}^+/\text{Ag}$  electrode (a silver wire immersed in 0.1 M  $\text{Bu}_4\text{NClO}_4/0.01 \text{ M AgClO}_4/\text{CH}_3\text{CN}$ ). The solutions were deoxygenated with pure argon before measurement. Cyclic voltammograms of **1**• $\text{PF}_6$  were simulated with the BASi Digisim 3.03a software.

## Materials

Tetra-*n*-butylammonium hexafluoro phosphate (purchased from Tokyo Chemical Industry) was recrystallized from HPLC-grade ethanol and dried under vacuum for 24 h. 2,9-Bis(9-anthracenyl)-1,10-phenanthroline ( $L_{\text{Anth2}}$ )<sup>10</sup>, 4,4'-dimethyl-2,2'-bipyrimidine ( $\text{Me}_2\text{bpym}$ )<sup>9</sup> were prepared according to literature methods. Other chemicals were used as purchased.

## Synthesis of $[\text{Cu}(\text{Me}_2\text{bpym})(L_{\text{Anth2}})]\text{PF}_6$

2,9-bis(9-anthracenyl)-1,10-phenanthroline ( $L_{\text{Anth2}}$ , 49.1 mg, 92.2  $\mu\text{mol}$ ) and  $[\text{Cu}(\text{CH}_3\text{CN})_4]\text{PF}_6$  (34.6 mg, 94.8  $\mu\text{mol}$ ) were stirred for 40 min in dichloromethane (4 ml) under nitrogen atmosphere. 4,4'-dimethyl-2,2'-bipyrimidine ( $\text{Me}_2\text{bpym}$ , 20 mg, 58  $\mu\text{mol}$ ) was added to the resulted orange solution, and the solution immediately changed to deep red. After filtration, diethyl ether was added to the filtrate to precipitate  $\mathbf{1} \cdot \text{PF}_6$  as a deep red solid. Yield: 17 mg (20 %).

**$^1\text{H}$  NMR** (500 MHz,  $(\text{CD}_3)_2\text{CO}$ , 253 K)  $\delta$  9.31 (d,  $J = 8.1$  Hz, phen, *ii*), 9.27 (d,  $J = 8.1$  Hz, phen, *io*), 9.25 (d,  $J = 8.1$  Hz, phen, *oo*), 8.68 (s, phen, *ii*), 8.66 (s, phen, *io*), 8.64 (s, phen, *oo*), 8.54 (d,  $J = 8.1$  Hz, phen, *ii*), 8.46 (d,  $J = 8.1$  Hz, phen, *io*), 8.44 (d,  $J = 8.1$  Hz, phen, *oo*), 8.40 (d,  $J = 4.8$  Hz, bpym, *ii*), 8.28 (d,  $J = 4.9$  Hz, bpym, *io*), 8.04 (s, Anth, *io*), 8.03 (s, Anth, *oo*), 8.01 (s, Anth, *ii*), 7.63-7.60 (m), 7.40 (d,  $J = 8.7$  Hz, Anth), 7.37 (d,  $J = 8.7$  Hz, Anth), 7.32-7.29 (m), 7.25 (d,  $J = 5.3$  Hz, bpym, *io*), 7.22-7.09 (m), 6.77 (d,  $J = 4.8$  Hz, bpym, *ii*), 6.66 (d,  $J = 4.9$  Hz, bpym, *io*), 6.54 (d,  $J = 5.3$  Hz, bpym, *io*), 6.45 (d,  $J = 5.3$  Hz, bpym, *oo*), 2.41 (s, Me, *o*), 2.37 (s, Me, *io*), 1.57 (s, Me, *io*), 1.50 (s, Me, *ii*).

**ESI-TOF-MS**  $m/z$  781.2144 (calcd. for  $[\text{M-PF}_6]^+$ , 781.2141)

**Table S1** Fitting parameters of the ring inversion processes for **1**•PF<sub>6</sub> in 0.1 M <sup>n</sup>Bu<sub>4</sub>NPF<sub>6</sub>-acetone

|                                                     | 293 K                | 273 K                | 253 K                | 219 K                |
|-----------------------------------------------------|----------------------|----------------------|----------------------|----------------------|
| $E_{oo} / \text{V}$                                 | 0.265                | 0.22                 | 0.185                | 0.14                 |
| $E_{io} / \text{V}$                                 | 0.48                 | 0.449                | 0.425                | 0.375                |
| $E_{ii} / \text{V}$                                 | 0.61                 | 0.584                | 0.57                 | 0.53                 |
| $K^{\text{I}}_{ii \rightarrow io}$                  | 2.6                  | 2.5                  | 2.2                  | 2                    |
| $K^{\text{I}}_{io \rightarrow oo}$                  | 0.2                  | 0.18                 | 0.17                 | 0.14                 |
| $K^{\text{II}}_{ii \rightarrow io}$                 | $4.5 \times 10^2$    | $7.7 \times 10^2$    | $1.3 \times 10^3$    | $7.3 \times 10^3$    |
| $K^{\text{II}}_{io \rightarrow oo}$                 | $9.9 \times 10^2$    | $3.1 \times 10^3$    | $1.1 \times 10^4$    | $3.6 \times 10^4$    |
| $k^{\text{I}}_{ii \rightarrow io} / \text{s}^{-1}$  | 11                   | 1.3                  | 0.1                  | 0                    |
| $k^{\text{I}}_{io \rightarrow oo} / \text{s}^{-1}$  | 8                    | 2.7                  | 0.5                  | 0                    |
| $k^{\text{I}}_{oo \rightarrow io} / \text{s}^{-1}$  | 40                   | 15                   | 3                    | 0                    |
| $k^{\text{I}}_{io \rightarrow ii} / \text{s}^{-1}$  | 4                    | 0.5                  | 0.05                 | 0                    |
| $k^{\text{II}}_{ii \rightarrow io} / \text{s}^{-1}$ | 3.2                  | 1.5                  | $6.4 \times 10^{-1}$ | 0                    |
| $k^{\text{II}}_{io \rightarrow oo} / \text{s}^{-1}$ | 5.0                  | 3.1                  | 1.1                  | 0                    |
| $k^{\text{II}}_{oo \rightarrow io} / \text{s}^{-1}$ | $5.0 \times 10^{-3}$ | $1.0 \times 10^{-3}$ | $1.0 \times 10^{-4}$ | 0                    |
| $k^{\text{II}}_{io \rightarrow ii} / \text{s}^{-1}$ | $7.0 \times 10^{-3}$ | $2.0 \times 10^{-3}$ | $5.0 \times 10^{-4}$ | 0                    |
| $\alpha_{oo}$                                       | 0.5                  | 0.5                  | 0.3                  | 0.5                  |
| $\alpha_{io}$                                       | 0.5                  | 0.5                  | 0.5                  | 0.35                 |
| $\alpha_{ii}$                                       | 0.5                  | 0.5                  | 0.5                  | 0.35                 |
| $R_{\text{u}}$                                      | 700                  | 800                  | 1000                 | 1600                 |
| $C_{\text{dl}} / \text{F}$                          | $4.2 \times 10^{-6}$ | $4.2 \times 10^{-6}$ | $4.2 \times 10^{-6}$ | $3.0 \times 10^{-6}$ |
| $D / \text{cm}^2 \text{s}^{-1}$                     | $1.2 \times 10^{-5}$ | $8.5 \times 10^{-6}$ | $4.5 \times 10^{-6}$ | $2.0 \times 10^{-6}$ |

**Table S2** Thermodynamic and kinetic parameters of **1**•**PF<sub>6</sub>** in 0.1 M <sup>n</sup>Bu<sub>4</sub>NPF<sub>6</sub>-acetone

|                                                     | <i>ii</i> → <i>io</i> | <i>io</i> → <i>oo</i> | <i>oo</i> → <i>io</i> | <i>io</i> → <i>ii</i> |
|-----------------------------------------------------|-----------------------|-----------------------|-----------------------|-----------------------|
| $\Delta H^\circ/\text{kJ mol}^{-1}$                 | 2.0                   | 2.4                   | -2.4                  | -2.0                  |
| $\Delta S^\circ/\text{J K}^{-1} \text{mol}^{-1}$    | 15                    | -5.4                  | 5.4                   | -15                   |
| $\Delta G^\circ/\text{kJ mol}^{-1}$                 | -2.4                  | 4.0                   | -4.0                  | 2.4                   |
| $\Delta H^\ddagger/\text{kJ mol}^{-1}$              | 68                    | 41                    | 38                    | 65                    |
| $\Delta S^\ddagger/\text{J K}^{-1} \text{mol}^{-1}$ | 6.4                   | -88                   | -84                   | -11                   |
| $\Delta G^\ddagger/\text{kJ mol}^{-1}$              | 66                    | 67                    | 63                    | 68                    |

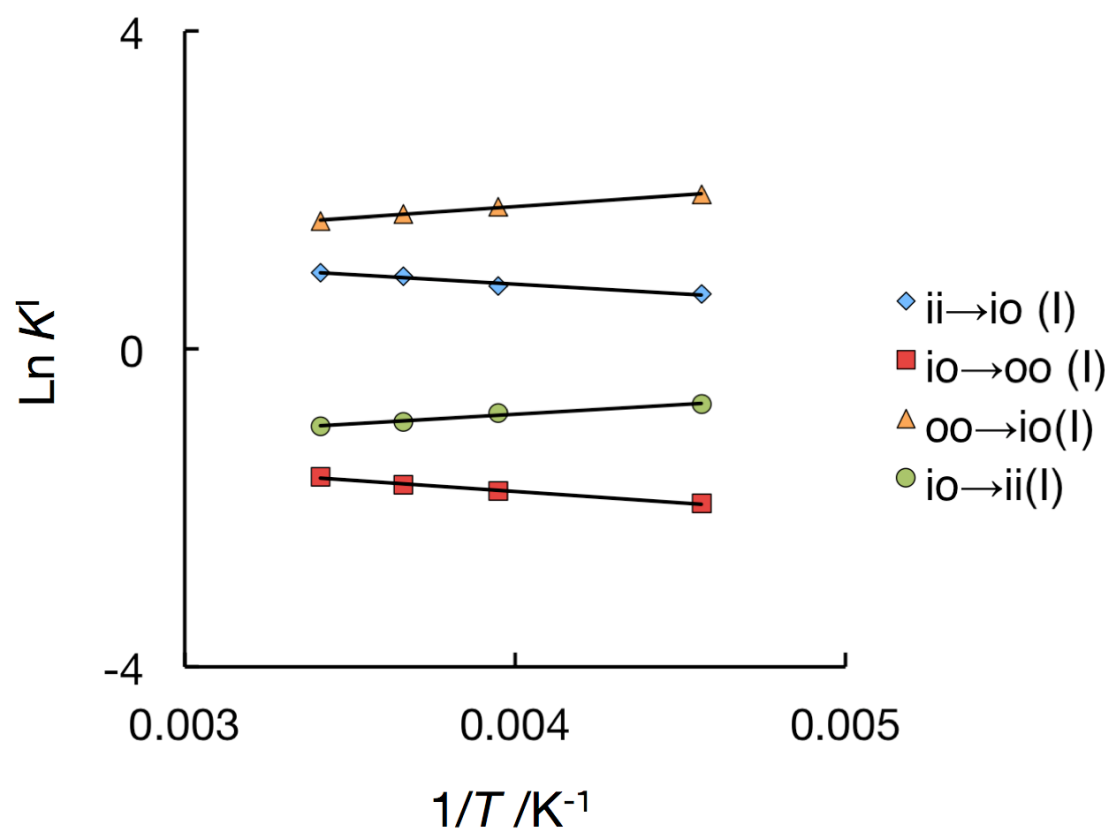

**Fig. S1** van't Hoff plots of  $1\cdot\text{PF}_6$  obtained by simulative analysis on cyclic voltammograms.

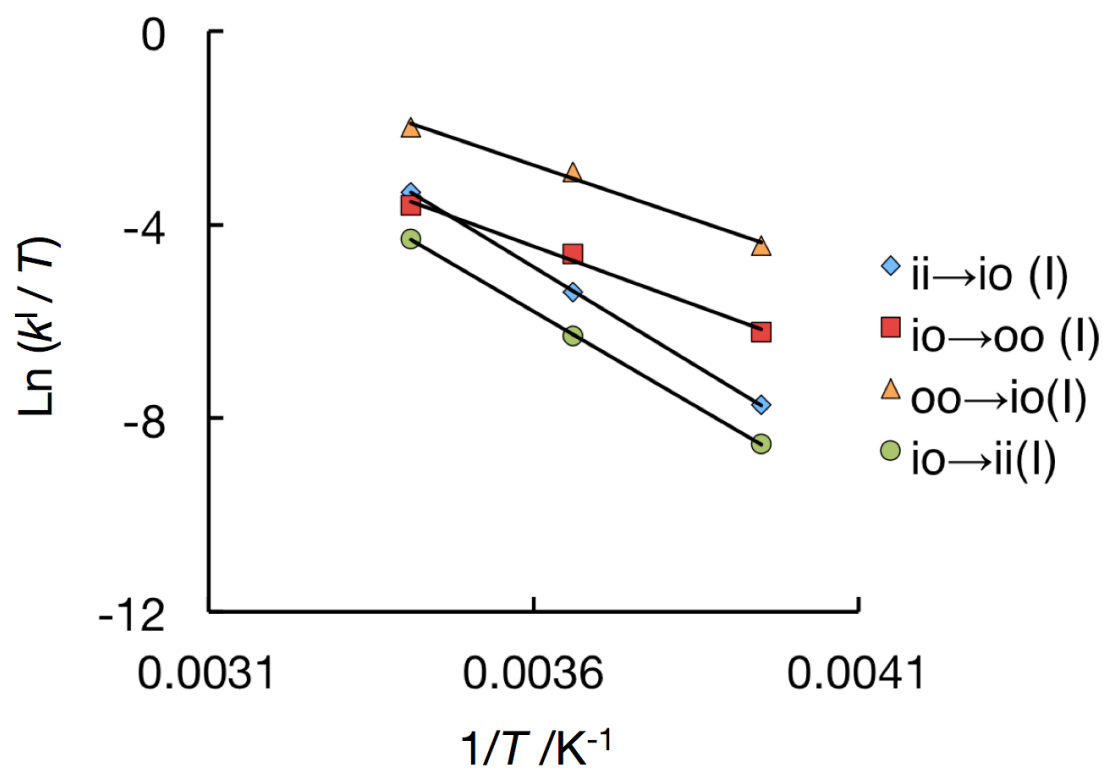

**Fig. S2** Eyring plots of **1**•PF<sub>6</sub> obtained by simulative analysis on cyclic voltammograms.

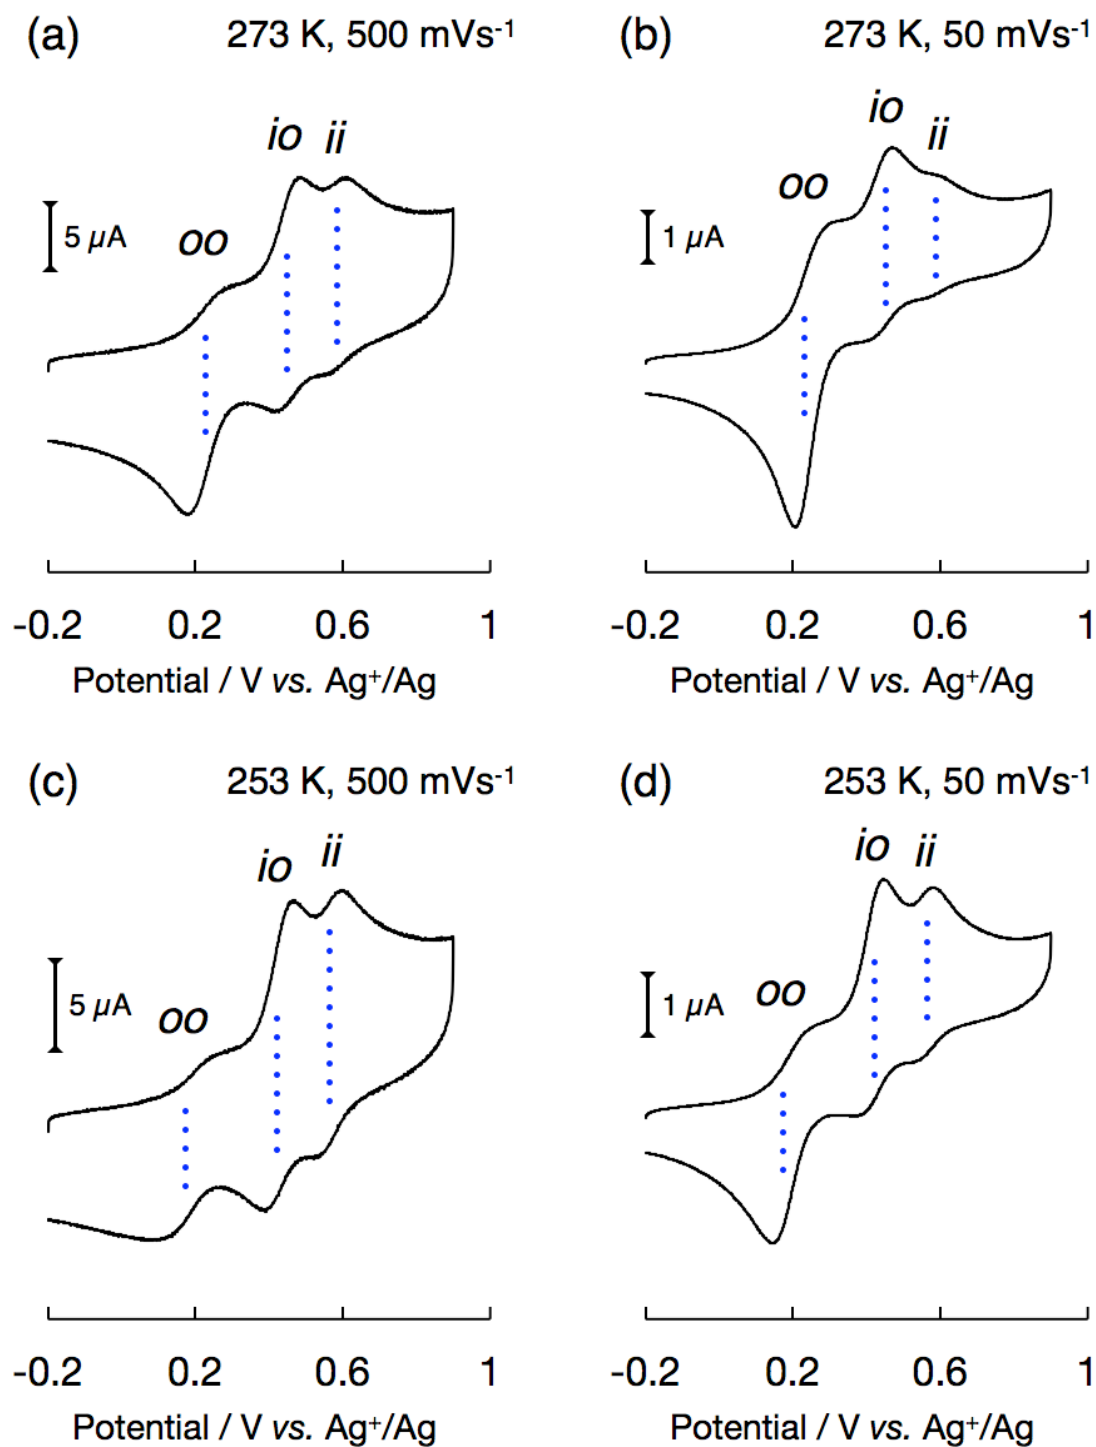

**Fig. S3** Cyclic voltammograms of **1**<sup>+</sup> (0.5 mM) in 0.1 M <sup>n</sup>Bu<sub>4</sub>NPF<sub>6</sub>-acetone at various temperatures and scan rates. (a) 273 K and 500 mVs<sup>-1</sup>, (b) 273 K and 50 mVs<sup>-1</sup>, (c) 253 K and 500 mVs<sup>-1</sup>, and (d) 253 K and 50 mVs<sup>-1</sup>. All voltammograms are for the first cycle.



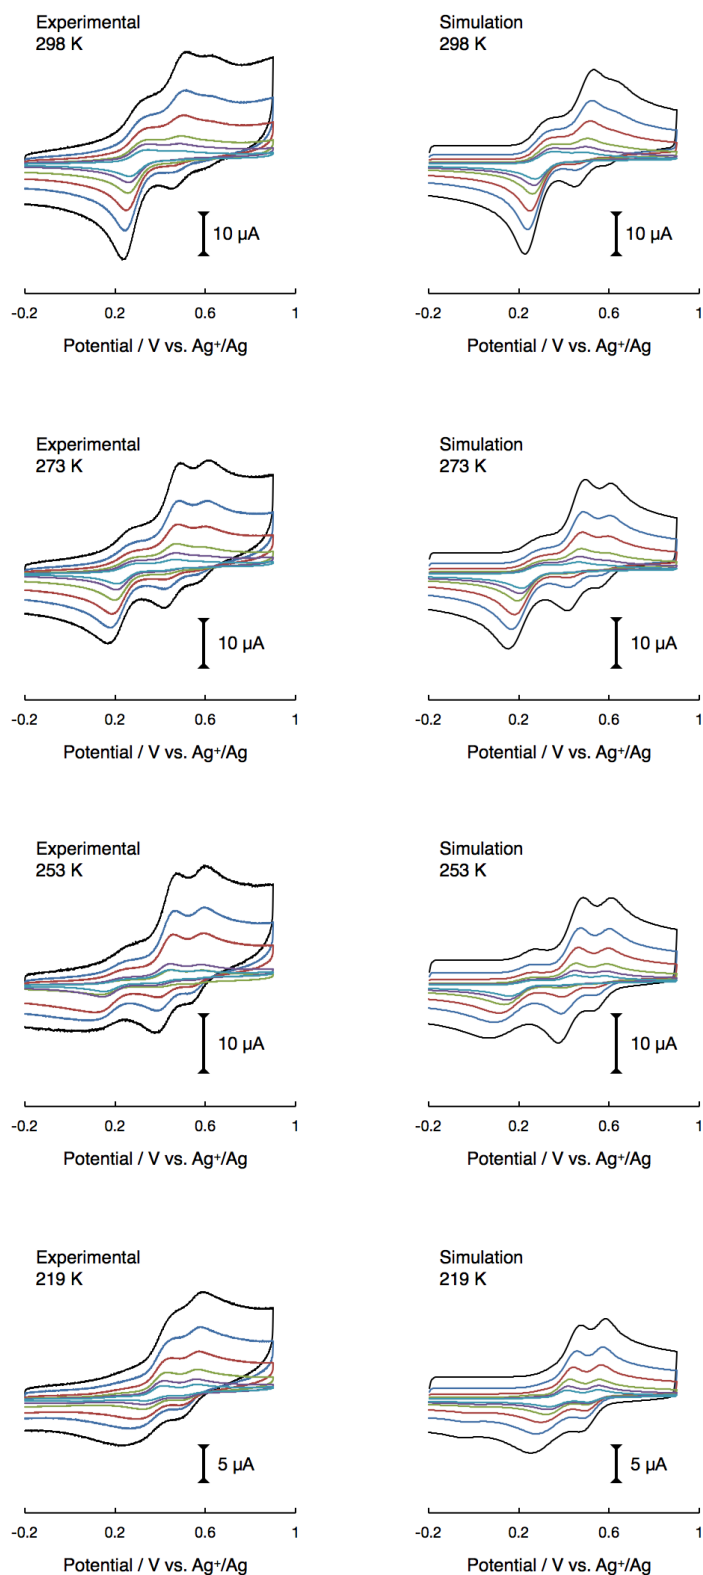

**Fig. S4** Experimental and simulated cyclic voltammograms of  $1^+$  (0.5 mM) in 0.1 M  $n\text{Bu}_4\text{NPF}_6$ -acetone at various temperatures and scan rates (1000, 500, 250, 100, 50, 25  $\text{mVs}^{-1}$ ). All voltammograms are for the first cycle.

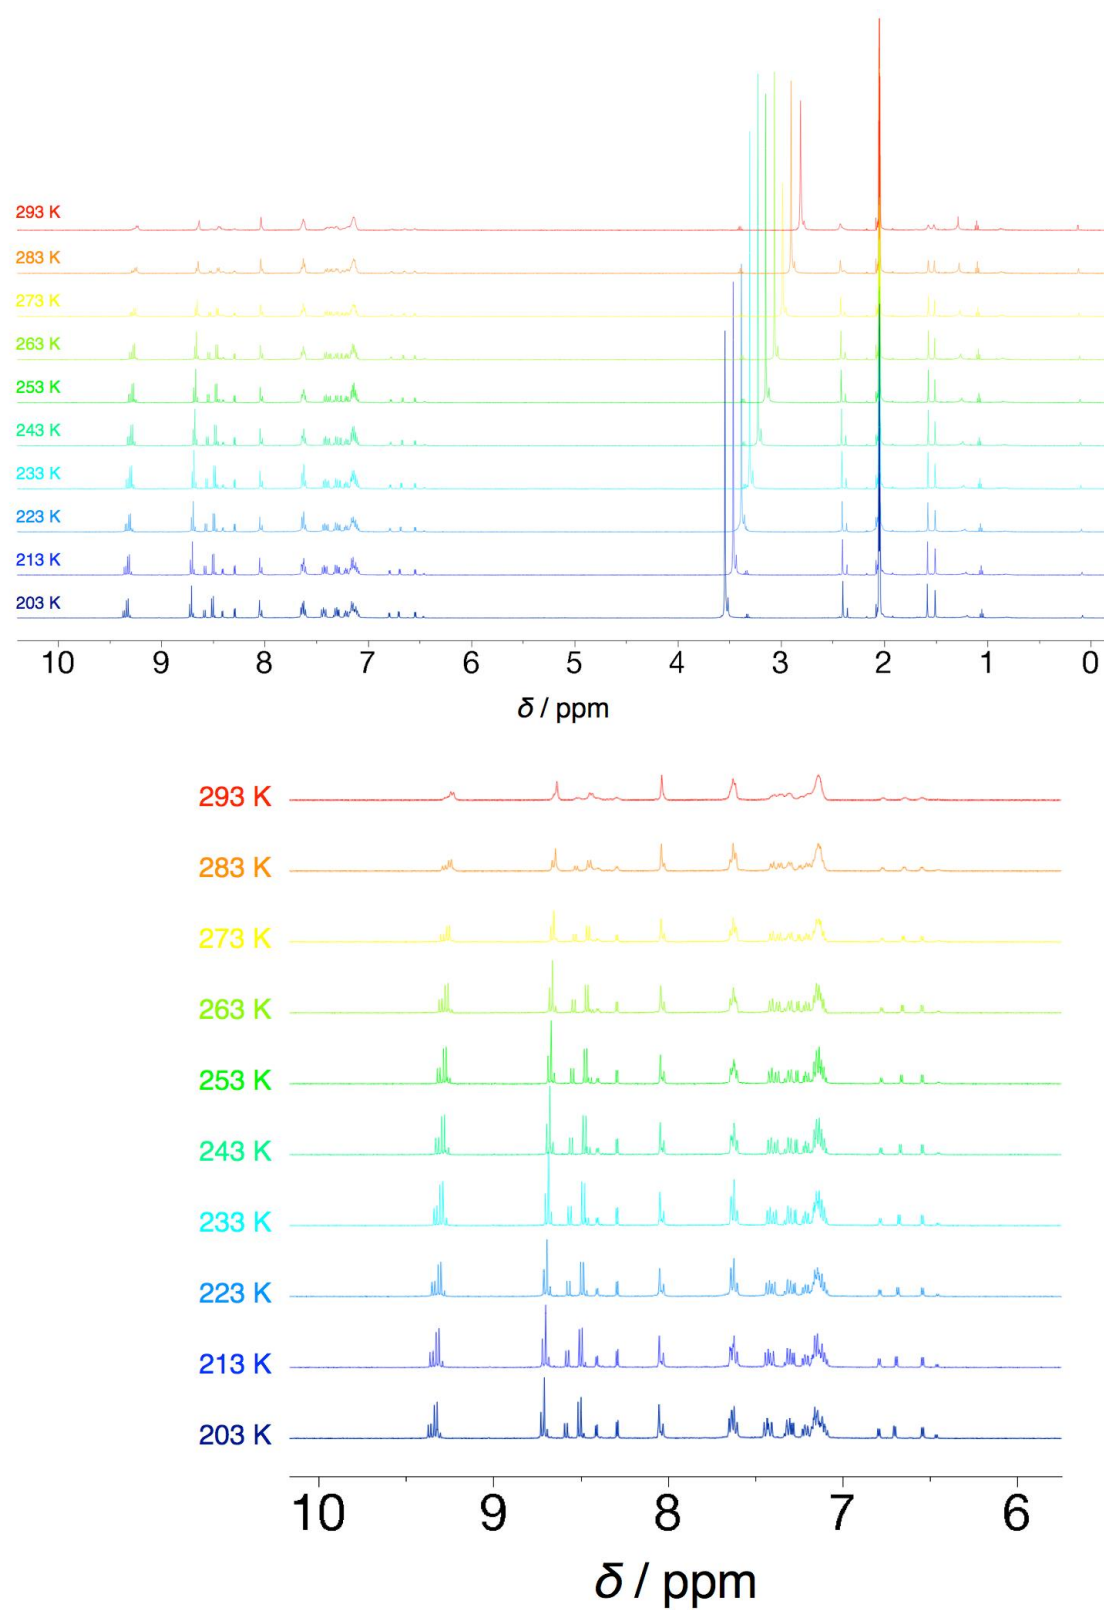

**Fig. S5**  $^1\text{H}$  NMR spectra of  $\mathbf{1} \cdot \text{PF}_6$  in  $\text{acetone-}d_6$  at various temperatures.

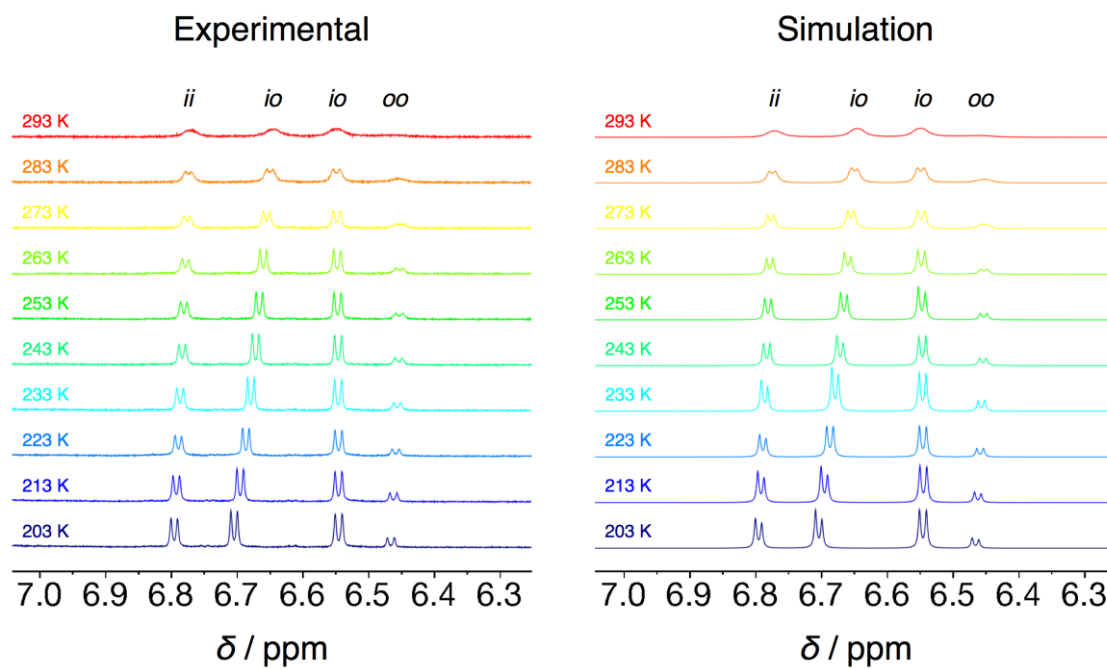

**Fig. S6** Experimental and simulated  $^1\text{H}$  NMR spectra of  $1\cdot\text{PF}_6$  in acetone- $d_6$  at various temperatures.

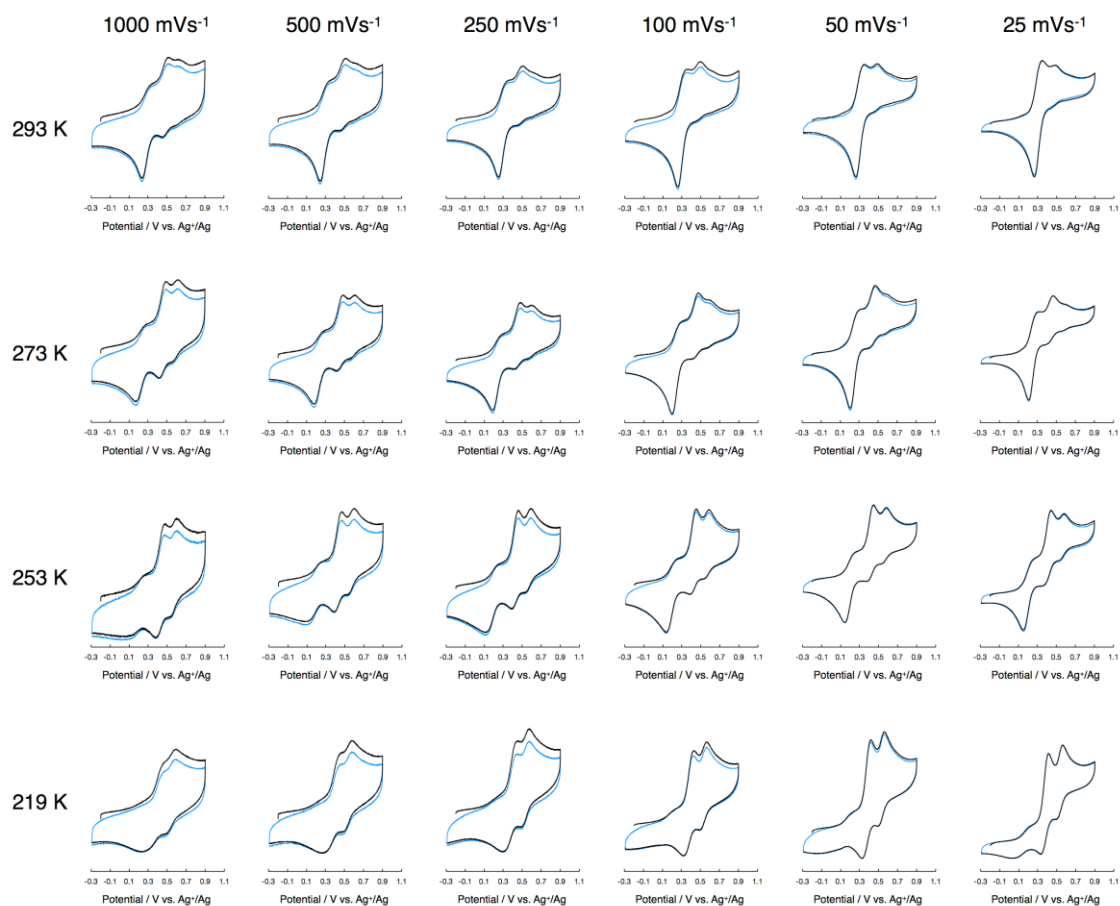

**Fig. S7** Cyclic voltammograms of  $1^+$  (0.5 mM) in 0.1 M  $n\text{Bu}_4\text{NPF}_6$ -acetone at various temperatures and scan rates. Black and blue curves are for the 1st and 2nd potential cycles, respectively.

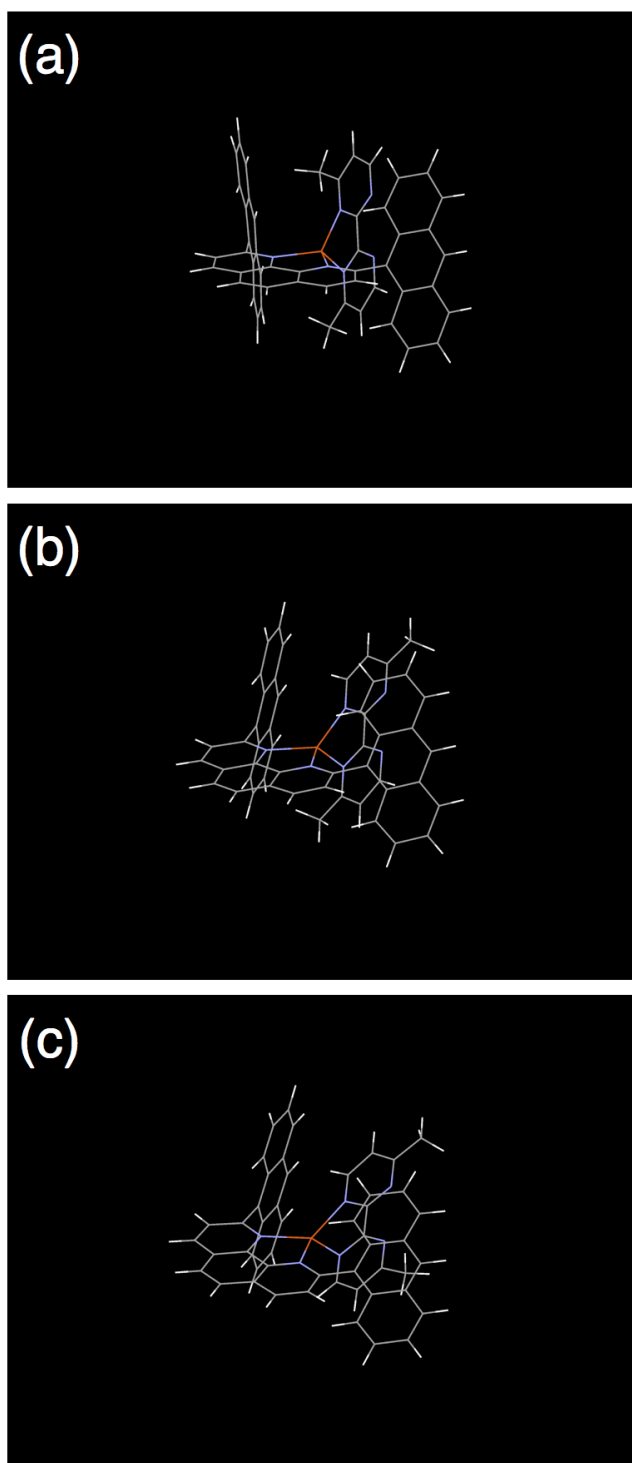

**Fig. S8** Optimized structures (B3LYP/LANL2DZ for Cu, /6-31g(d) for the other atoms) of *ii*-isomer (a), *io*-isomer (b) and *oo*-isomer (c).

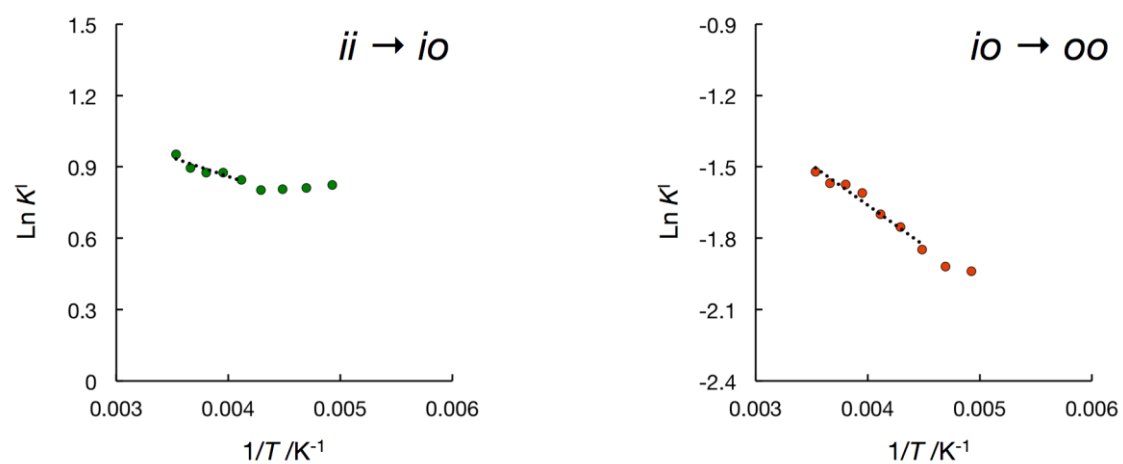

**Fig. S9** van't Hoff plots obtained from the integrated values of the  $^1\text{H}$  NMR signals in acetone- $d_6$ .
